# Supplementary material
Source: HighWire-hosted journal article supplement (https://www.annfammed.org/highwire/filestream/7923/field_highwire_adjunct_files/0/Furler_Supp_App.pdf)
Supplement: Furler_Supp_App.pdf [file Furler_Supp_App.pdf]

**Online Supplementary Material**

Furler J, Kokanovic R, Dowrick C, Newton D, Gunn J, May C. Managing depression among ethnic communities: a qualitative study. *Ann Fam Med*. 2010;8(3):231-236.

<http://www.annfammed.org/cgi/content/full/8/3/231/DC1>

---

**Supplemental Appendix. Interview Schedule**

**Preamble**

The interviewer will provide some initial information about the main Re-order study and link it with the cross-cultural Re-order. To facilitate starting of the discussion, broad opening questions will address the following areas:

- Family physicians' own views of depression (concept and ideal management, including cause of depression, the diagnostic process, and treatment of depression)
- Their own experiences and issues in working in this particular setting (Community Health Centre) with these particular communities and members of the community who are attending a centre for issues related to mental health, particularly depression and depressive symptoms.
- Providing concrete examples (a story) of clinical encounters (negotiating diagnosis and treatment) with people experiencing symptoms of depression (focusing on the actual patients they care for)
- Depending on the response, the interviewees will be encouraged to expand on certain areas with the prompts

Topics to be covered in the interview include:

- The family physician's constructs of depression
- Special interest in community health and cross-cultural mental health
- Cultural issues around label of depression: diagnosis, diagnostic tools, prescribed medication and antidepressants
- Cross-cultural factors in clinical interaction (understanding idioms of distress in the particular community they are working with, working with interpreters, providing translated materials)
- Actions taken (treatment plan, referral, how they make an appropriate referral, what is considered an appropriate referral)
- Perceived outcomes (how do they follow up)
- Systemic factors (broader policy level, micro - immediate work environment) that either enable or disable health processes and outcomes
- ANYTHING ELSE TO ADD?

---

Re-order is a 3-year study by the Australian Primary Health Care Research Institute to investigate the management of depression in general practice, conducted in partnership with a team of academics from Australia and the United Kingdom.
